# Supplementary material for: Plasma Metabolomic Profiling Reveals Four Possibly Disrupted Mechanisms in Systemic Sclerosis
Source: MDPI journal article supplement (doi:10.3390/biomedicines10030607), 2022-03-04
Supplement: s1 [file s1]

**Supplementary Table S1.** Clinical information about sample cohort.

| <b>Clinical data</b>                                              | <b>Control</b><br>(n = 48) | <b>SSc</b><br>(n = 52) | <b>ncSSc</b><br>(n = 2) | <b>lcSSc</b><br>(n = 39) | <b>dcSSc</b><br>(n = 11) |
|-------------------------------------------------------------------|----------------------------|------------------------|-------------------------|--------------------------|--------------------------|
| Age <sup>1</sup> / mean $\pm$ standard deviation                  | 51 $\pm$ 16                | 60 $\pm$ 12            | 34 $\pm$ 9              | 62 $\pm$ 11              | 57 $\pm$ 9               |
| Female / n                                                        | 37                         | 44                     | 2                       | 36                       | 6                        |
| Male / n                                                          | 11                         | 8                      | 0                       | 3                        | 5                        |
| BMI / mean $\pm$ standard deviation                               | -                          | 25 $\pm$ 7             | 26 $\pm$ 0              | 24 $\pm$ 7               | 24 $\pm$ 6               |
| <b>Antibodies</b>                                                 |                            |                        |                         |                          |                          |
| Anti-Centromere / n                                               | -                          | 18                     | 1                       | 16                       | 1                        |
| Anti-Scl70 / n                                                    | -                          | 17                     | 1                       | 8                        | 8                        |
| Anti-Pm-Scl75 / n                                                 | -                          | 1                      | 0                       | 1                        | 0                        |
| Anti-Rnp/Sm / n                                                   | -                          | 3                      | 0                       | 3                        | 0                        |
| Anti-Pm-Scl100 / n                                                | -                          | 1                      | 0                       | 1                        | 0                        |
| Anti-SSA / n                                                      | -                          | 5                      | 0                       | 3                        | 2                        |
| <b>Symptoms</b>                                                   |                            |                        |                         |                          |                          |
| Modified Rodnan skin score (mRSS) / mean $\pm$ standard deviation | -                          | 12 $\pm$ 11            | 0 $\pm$ 0               | 8 $\pm$ 4                | 28 $\pm$ 11              |
| Pulmonary hypertension (PAH) / n                                  | -                          | 10                     | 0                       | 6                        | 4                        |
| Lung fibrosis / n                                                 | -                          | 14                     | 0                       | 6                        | 8                        |
| Dysphagy / n                                                      | -                          | 28                     | 1                       | 22                       | 5                        |
| Reflux / n                                                        | -                          | 27                     | 0                       | 21                       | 6                        |
| Raynaud's phenomenon (RP) / n                                     | -                          | 44                     | 2                       | 34                       | 8                        |
| Digital ulcers (DU) / n                                           | -                          | 10                     | 0                       | 6                        | 4                        |
| Calcinosis cutis / n                                              | -                          | 15                     | 1                       | 11                       | 3                        |
| Sicca / n                                                         | -                          | 14                     | 0                       | 10                       | 4                        |
| <b>Medication</b>                                                 |                            |                        |                         |                          |                          |
| Ambrisentan / n                                                   | -                          | 2                      | 0                       | 2                        | 0                        |
| Bosentan / n                                                      | -                          | 8                      | 0                       | 6                        | 2                        |
| Domperidone / n                                                   | -                          | 7                      | 0                       | 4                        | 3                        |
| Ebetrexat / n                                                     | -                          | 14                     | 0                       | 9                        | 5                        |
| Ivabradine / n                                                    | -                          | 1                      | 0                       | 0                        | 1                        |
| Macitentan / n                                                    | -                          | 10                     | 0                       | 7                        | 3                        |
| Mycophenolate mofetil / n                                         | -                          | 5                      | 0                       | 1                        | 4                        |
| Pantoprazole / n                                                  | -                          | 26                     | 1                       | 17                       | 8                        |
| Prednisolone / n                                                  | -                          | 7                      | 0                       | 5                        | 2                        |
| Sildenafil / n                                                    | -                          | 1                      | 0                       | 1                        | 0                        |
| Tadalafil / n                                                     | -                          | 1                      | 0                       | 0                        | 1                        |
| Treprostinil / n                                                  | -                          | 1                      | 0                       | 0                        | 1                        |

<sup>1</sup> p-Values: control/SSc: 0.006; control/lcSSc: 0.002; control/dcSSc: 0.705; control/dcSSc: 0.765; lcSSc/dcSSc: 0.738

**Supplementary Table S2.** Significant regulated metabolites of the targeted approach according to p-value (<0.05).

| Exact Mass<br>m/z | RT<br>min | Name              | p-value | FDR<br>corrected<br>p-value | Fold change<br>(SSc/Control) |
|-------------------|-----------|-------------------|---------|-----------------------------|------------------------------|
| 205.0971          | 14.7      | Tryptophan        | <0.0001 | 0.0005                      | 0.3117                       |
| 90.0549           | 18.2      | Alanine           | <0.0001 | 0.0009                      | 0.3444                       |
| 203.1503          | 23.2      | Dimethylarginine  | <0.0001 | 0.0015                      | 2.6918                       |
| 209.0921          | 14.5      | Kynurenine        | 0.0004  | 0.0046                      | 2.1049                       |
| 176.1030          | 22.1      | Citrulline        | 0.0016  | 0.0160                      | 2.3760                       |
| 133.0972          | 23.9      | Ornithine         | 0.0026  | 0.0216                      | 2.3604                       |
| 170.0924          | 23.4      | 1-Methylhistidine | 0.0031  | 0.0218                      | 2.2506                       |
| 182.0811          | 16.9      | Tyrosine          | 0.0043  | 0.0268                      | 0.5033                       |
| 76.0756           | 5.2       | TMAO              | 0.0074  | 0.0408                      | 1.7656                       |
| 189.1598          | 23.7      | Trimethyllysine   | 0.0090  | 0.0451                      | 1.9979                       |
| 260.1856          | 4.0       | Hexanoylcarnitine | 0.0103  | 0.0467                      | 1.8243                       |
| 150.0583          | 15.1      | Methionine        | 0.0222  | 0.0865                      | 0.6511                       |
| 204.1230          | 7.1       | Acetylcarnitine   | 0.0225  | 0.0865                      | 1.2031                       |
| 104.1069          | 5.0       | Choline           | 0.0245  | 0.0874                      | 1.8805                       |
| 288.2169          | 3.4       | Octanoylcarnitine | 0.0356  | 0.1103                      | 1.5653                       |
| 146.1049          | 23.9      | Lysine            | 0.0364  | 0.1103                      | 0.5802                       |
| 246.1699          | 4.5       | Valerylcarnitine  | 0.0375  | 0.1104                      | 0.6813                       |
| 126.0219          | 14.8      | Taurine           | 0.0458  | 0.1247                      | 1.3416                       |
| 116.0706          | 15.2      | Proline           | 0.0478  | 0.1247                      | 0.5495                       |
| 170.0924          | 23.8      | 3-Methylhistidine | 0.0499  | 0.1247                      | 2.1241                       |

**Supplementary Table S3.** Significant regulated metabolites of the untargeted approach according to p-value (<0.05).

| Observed Mass<br>m/z | RT<br>min | DTCCSN <sub>2</sub> | p-value  | FDR<br>corrected p-<br>value | Fold change<br>(SSc/Control) |
|----------------------|-----------|---------------------|----------|------------------------------|------------------------------|
| 287.0993             | 4.279     | 166.95              | 0.000004 | 0.00048791                   | 2.2385                       |
| 572.3679             | 13.890    | 236.76              | 0.000004 | 0.00048791                   | 0.4771                       |
| 265.1168             | 4.283     | 160.02              | 0.000007 | 0.00053427                   | 2.1906                       |
| 577.1323             | 11.287    | 222.84              | 0.000024 | 0.0013081                    | 3.5230                       |
| 982.8666             | 14.994    | 195.74              | 0.000061 | 0.0026669                    | 1.9977                       |
| 130.0490             | 4.283     | 166.63              | 0.000091 | 0.0033336                    | 2.0638                       |
| 627.5318             | 13.777    | 265.54              | 0.000188 | 0.0058765                    | 0.4985                       |
| 572.3676             | 13.511    | 238.65              | 0.000221 | 0.0060392                    | 0.4958                       |
| 655.1675             | 20.444    | 234.20              | 0.000434 | 0.0094701                    | 3.1643                       |
| 880.4826             | 9.618     | 298.39              | 0.000481 | 0.0094701                    | 0.5783                       |
| 796.5225             | 9.653     | 288.02              | 0.000508 | 0.0094701                    | 0.5802                       |
| 982.8683             | 14.965    | 410.95              | 0.000519 | 0.0094701                    | 2.8088                       |
| 188.0699             | 15.944    | 150.77              | 0.000610 | 0.010283                     | 0.4242                       |
| 188.0700             | 15.944    | 140.20              | 0.000666 | 0.010424                     | 0.4130                       |
| 764.8804             | 14.778    | 258.82              | 0.000805 | 0.011662                     | 2.0910                       |
| 502.9284             | 14.879    | 218.82              | 0.000855 | 0.011662                     | 3.0748                       |
| 429.1163             | 11.595    | 195.05              | 0.000995 | 0.011662                     | 1.8714                       |
| 284.1651             | 21.624    | 162.68              | 0.001031 | 0.011662                     | 2.7399                       |
| 844.0756             | 20.873    | 245.46              | 0.001134 | 0.011662                     | 2.0913                       |
| 145.0986             | 17.950    | 133.49              | 0.001139 | 0.011662                     | 1.9719                       |
| 480.9461             | 14.653    | 216.18              | 0.001210 | 0.011662                     | 2.6689                       |

|          |        |        |          |          |        |
|----------|--------|--------|----------|----------|--------|
| 77.0915  | 13.255 | 170.72 | 0.001224 | 0.011662 | 2.8025 |
| 146.0595 | 15.944 | 142.36 | 0.001225 | 0.011662 | 0.4548 |
| 258.1094 | 22.914 | 156.62 | 0.001387 | 0.012242 | 0.5869 |
| 982.8685 | 14.889 | 303.81 | 0.001433 | 0.012242 | 1.7861 |
| 144.0799 | 15.945 | 126.83 | 0.001453 | 0.012242 | 0.5421 |
| 154.0734 | 20.872 | 252.96 | 0.001646 | 0.013352 | 2.3228 |
| 429.1163 | 11.302 | 195.04 | 0.001912 | 0.014954 | 2.1747 |
| 673.5254 | 13.619 | 274.79 | 0.002018 | 0.015202 | 0.7053 |
| 262.9586 | 14.910 | 219.83 | 0.002082 | 0.015202 | 2.7165 |
| 666.1790 | 19.180 | 236.60 | 0.002409 | 0.01702  | 0.4568 |
| 791.1546 | 6.221  | 268.60 | 0.002640 | 0.017804 | 2.4636 |
| 766.0407 | 20.443 | 233.83 | 0.002683 | 0.017804 | 1.5460 |
| 229.1817 | 13.257 | 156.21 | 0.002949 | 0.018912 | 2.8998 |
| 262.9585 | 14.788 | 174.00 | 0.003022 | 0.018912 | 2.5756 |
| 807.1291 | 6.213  | 257.99 | 0.003604 | 0.021927 | 1.6812 |
| 520.5067 | 13.474 | 249.89 | 0.004006 | 0.023708 | 0.7548 |
| 145.0488 | 10.072 | 146.57 | 0.004124 | 0.023764 | 1.4501 |
| 786.8622 | 14.771 | 250.77 | 0.004715 | 0.026219 | 2.0163 |
| 478.2900 | 13.330 | 213.84 | 0.004789 | 0.026219 | 0.6876 |
| 480.9462 | 14.916 | 216.21 | 0.004989 | 0.026647 | 2.2446 |
| 221.0915 | 15.977 | 150.56 | 0.005455 | 0.028445 | 0.6391 |
| 146.0595 | 15.944 | 130.20 | 0.006084 | 0.030985 | 0.5255 |
| 290.2086 | 23.411 | 168.24 | 0.006471 | 0.032208 | 2.5050 |
| 795.6706 | 13.101 | 304.47 | 0.006776 | 0.032977 | 0.7290 |
| 244.9477 | 14.790 | 174.33 | 0.007151 | 0.033462 | 2.4528 |
| 745.6186 | 13.319 | 292.15 | 0.007181 | 0.033462 | 0.7238 |
| 548.3662 | 13.987 | 234.01 | 0.007904 | 0.036064 | 0.5156 |
| 526.3264 | 13.605 | 227.19 | 0.009350 | 0.041788 | 0.4972 |
| 730.1975 | 20.871 | 239.93 | 0.010032 | 0.043481 | 1.8360 |
| 685.5613 | 13.472 | 286.32 | 0.010126 | 0.043481 | 0.9840 |
| 783.6341 | 13.203 | 296.53 | 0.015269 | 0.064307 | 0.7605 |
| 712.9902 | 21.168 | 226.25 | 0.019138 | 0.078155 | 1.5972 |
| 652.1637 | 20.442 | 234.20 | 0.019271 | 0.078155 | 1.4786 |
| 786.1998 | 11.610 | 257.55 | 0.020029 | 0.078295 | 1.3767 |
| 925.9038 | 24.246 | 214.25 | 0.020297 | 0.078295 | 1.5893 |
| 429.1158 | 11.585 | 186.73 | 0.020439 | 0.078295 | 1.7132 |
| 240.9509 | 14.763 | 183.25 | 0.021079 | 0.078295 | 1.8533 |
| 690.1894 | 4.681  | 240.60 | 0.021093 | 0.078295 | 1.9778 |
| 248.1485 | 12.479 | 156.00 | 0.021929 | 0.080039 | 1.2434 |
| 548.3655 | 13.634 | 234.76 | 0.022469 | 0.080666 | 0.5897 |
| 84.0443  | 21.523 | 136.14 | 0.026084 | 0.092135 | 1.3957 |
| 302.0178 | 20.545 | 159.85 | 0.026683 | 0.092753 | 1.7129 |
| 638.1842 | 11.608 | 235.32 | 0.028176 | 0.096415 | 1.4750 |
| 249.0167 | 23.336 | 159.53 | 0.032654 | 0.11002  | 0.7342 |
| 332.2419 | 7.364  | 193.87 | 0.039612 | 0.13144  | 1.6815 |
| 319.1668 | 16.948 | 174.09 | 0.041590 | 0.13594  | 1.8723 |
| 282.1188 | 17.039 | 164.31 | 0.048675 | 0.15676  | 1.3247 |

---
